# Supplementary material
Source: PubMed Central journal article supplement (PMC3264318)
Supplement: supp_80.2.668_IAI6191-11_supp_mat.pdf [file supp_80.2.668_IAI6191-11_supp_mat.pdf]

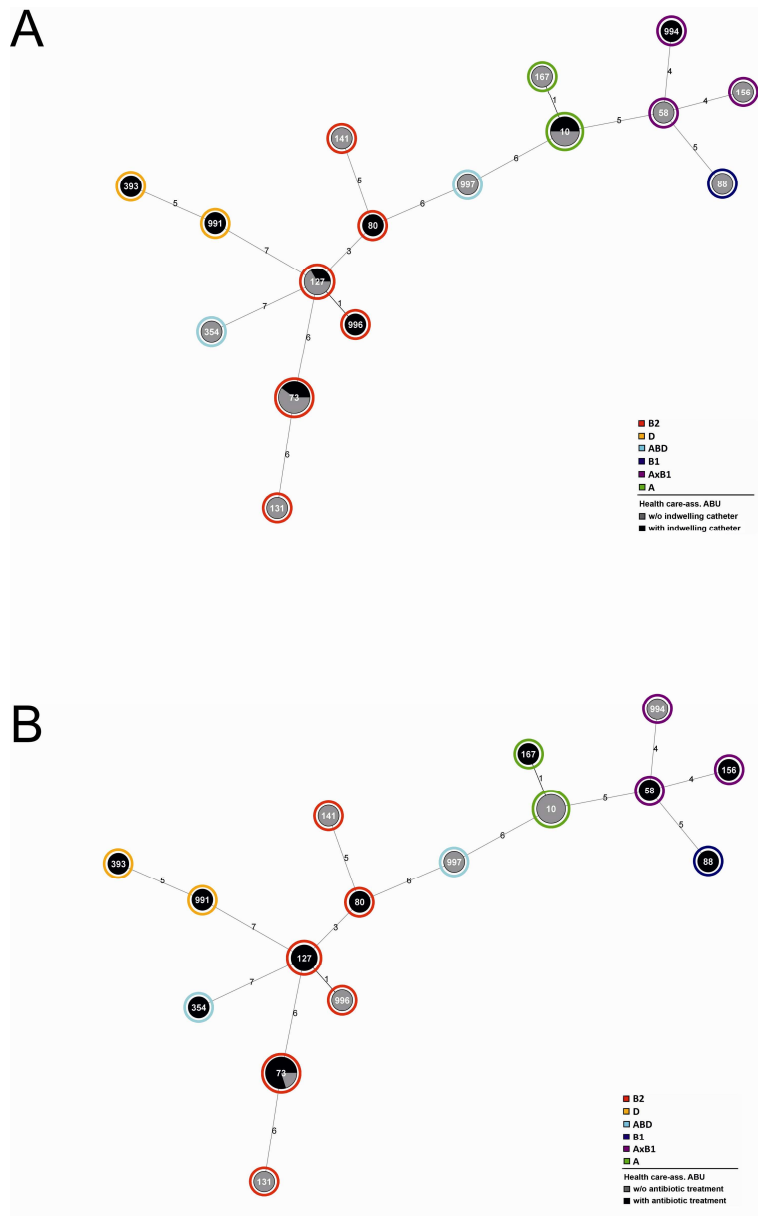

**Figure S1:** Phylogenetic background of health care-associated ABU *E. coli* isolates from patients with indwelling catheters or antibiotic treatment.

The minimum spanning tree of the concatenated MLST sequences as calculated by ClonalFrame has been depicted with Seqsphere (Ridom GmbH). The distribution of the ABU isolates with or without indwelling catheters A) (without indwelling catheter, dark grey; with indwelling catheter, black) or from patients with or without antibiotic treatment B) (without antibiotic treatment, dark grey; with antibiotic treatment, black) is indicated by pie charts. The size of the pie chart mirrors the number of strains allocated to the individual ST. Phylogenetic groups (A, B1, B2, D, AxB1, and ABD) as determined by STRUCTURE analysis of the MLST sequence data are indicated by the outmost ring of the tree.

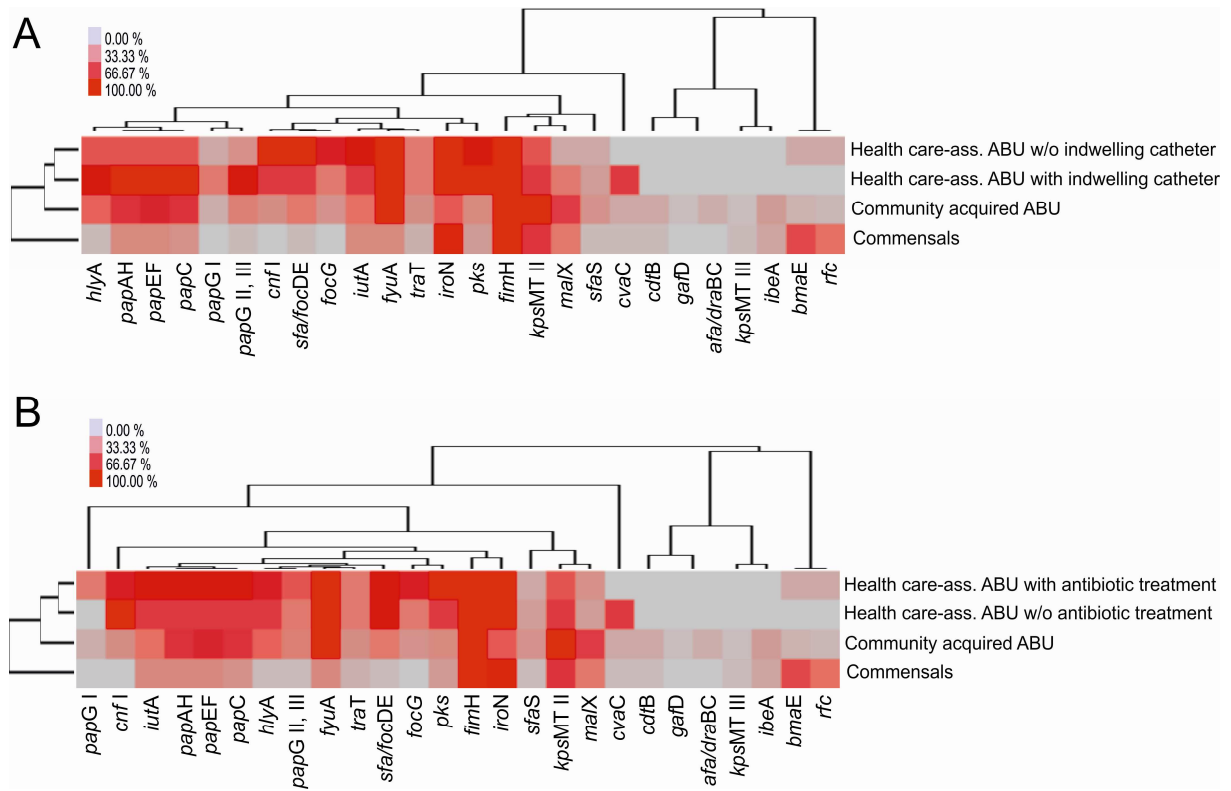

**Figure S2:** Virulence gene prevalences in health care-associated ABU *E. coli* isolates from patients with indwelling catheters or antibiotic treatment. Gene prevalence results of health care-associated ABU *E. coli* isolates dependent on long-term catheterization (A) or antibiotic treatment (B) were compared with that of community acquired ABU or commensal *E. coli* isolates by two-way clustering. A heat map was constructed based upon the percentage of each gene examined among each of the groups of isolates.

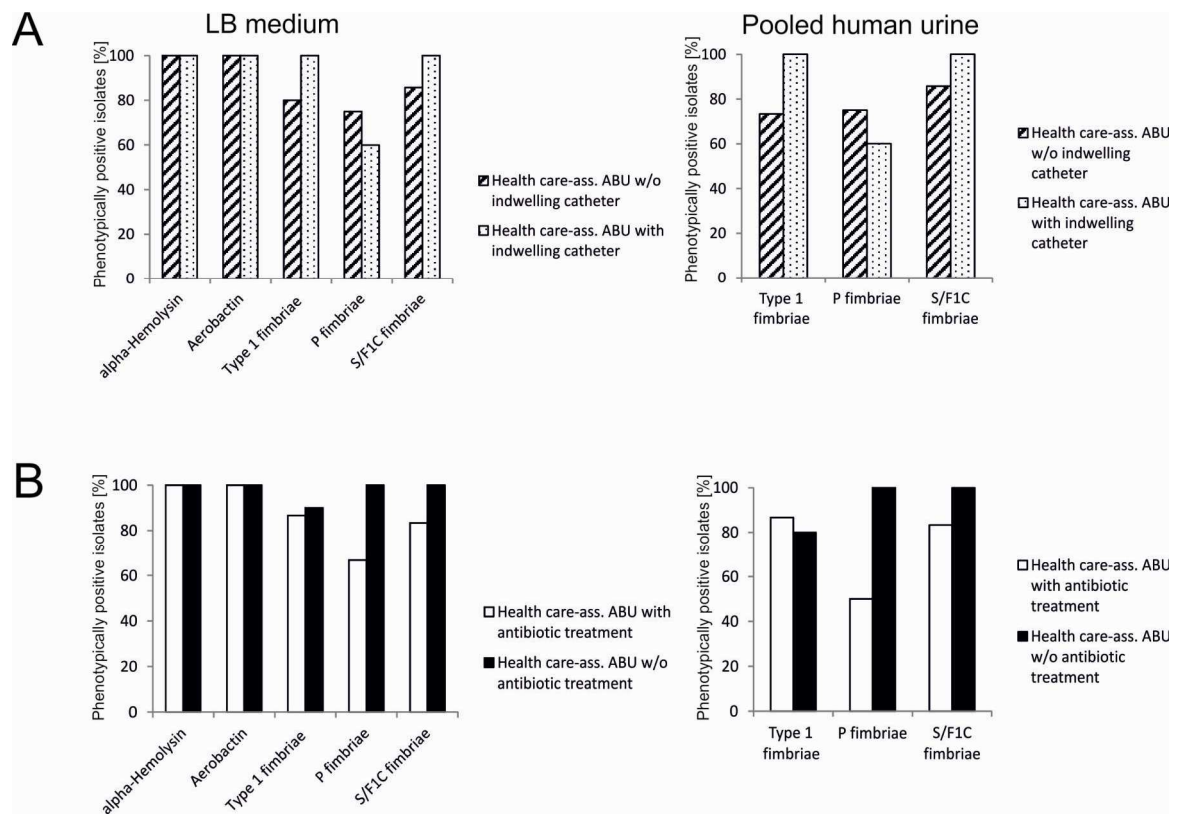

**Figure S3:** Phenotypic expression of selected virulence factors dependent on long-term catheterization (A) or antibiotic treatment (B) was analyzed upon in vitro cultivation of the isolates in LB or pooled human urine. The percentages of phenotypically positive isolates per group are indicated.

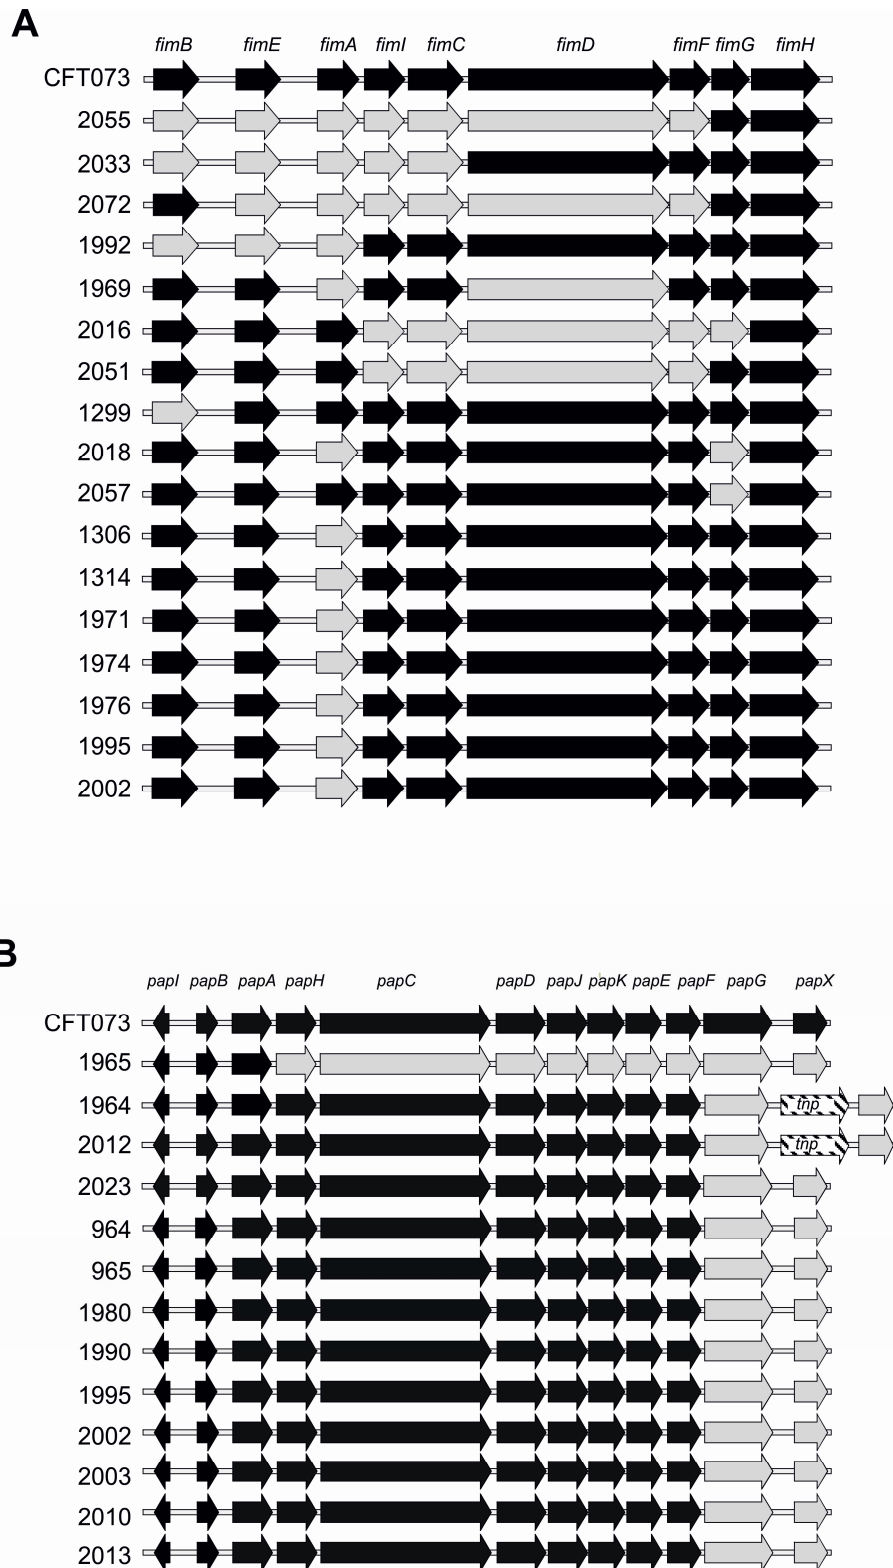

**Figure S4:** Genetic structures of the *fim* determinant A) and the *pap* determinant B) in ABU *E. coli* isolates. The scheme is based on the uropathogenic *E. coli* CFT073 chromosome. Arrows denote genes of the *fim* or *pap* determinant. Black arrows denote detectable ORFs, grey arrows denote ORFs which could not be amplified by PCR. The IS3-related, non-functional transposase-encoding gene is indicated by a hatched arrow.

**Table S1:** Genotypic characterization of *E. coli* from community acquired ABU or health care-associated patients

|                             | % of prevalence relative to the total no. of isolates |                                   |                  | Statistical significance of prevalence                |                                      |                                          |
|-----------------------------|-------------------------------------------------------|-----------------------------------|------------------|-------------------------------------------------------|--------------------------------------|------------------------------------------|
|                             | Community acquired ABU (n=87)                         | Health care-associated ABU (n=25) | Commensal (n=39) | Community acquired ABU vs. Health care-associated ABU | Community acquired ABU vs. Commensal | Health care-associated ABU vs. Commensal |
| <i>hlyA</i>                 | 25.29                                                 | 32.00                             | 2.56             | -                                                     | ** ( $P=0.002$ )                     | *** ( $P<0.0001$ )                       |
| <i>cnf1</i>                 | 13.79                                                 | 40.00                             | 0.00             | ** ( $P=0.0081$ )                                     | * ( $P=0.0174$ )                     | *** ( $P<0.0001$ )                       |
| <i>cdtB</i>                 | 6.90                                                  | 0.00                              | 2.56             | -                                                     | -                                    | -                                        |
| <i>iutA</i>                 | 22.99                                                 | 36.00                             | 15.38            | -                                                     | -                                    | -                                        |
| <i>fyuA</i>                 | 45.98                                                 | 68.00                             | 15.38            | -                                                     | ** ( $P=0.0012$ )                    | *** ( $P<0.0001$ )                       |
| <i>fimH</i>                 | 91.95                                                 | 100.00                            | 92.31            | -                                                     | -                                    | -                                        |
| <i>papAH</i>                | 31.03                                                 | 36.00                             | 10.26            | -                                                     | * ( $P=0.0136$ )                     | * ( $P=0.0234$ )                         |
| <i>papEF</i>                | 32.18                                                 | 36.00                             | 10.26            | -                                                     | ** ( $P=0.0084$ )                    | * ( $P=0.0234$ )                         |
| <i>papC</i>                 | 31.03                                                 | 36.00                             | 10.26            | -                                                     | * ( $P=0.0136$ )                     | * ( $P=0.0234$ )                         |
| <i>papG</i> allele I        | 5.75                                                  | 12.00                             | 0.00             | -                                                     | -                                    | -                                        |
| <i>papG</i> alleles II, III | 18.39                                                 | 24.00                             | 2.56             | -                                                     | * ( $P=0.0213$ )                     | * ( $P=0.019$ )                          |
| <i>sfa/focDE</i>            | 20.69                                                 | 40.00                             | 2.56             | -                                                     | ** ( $P=0.0069$ )                    | *** ( $P=0.0002$ )                       |
| <i>sfaS</i>                 | 12.64                                                 | 8.00                              | 2.56             | -                                                     | -                                    | -                                        |
| <i>focG</i>                 | 12.64                                                 | 28.00                             | 0.00             | -                                                     | * ( $P=0.0174$ )                     | *** ( $P=0.0008$ )                       |
| <i>kpsMT</i> II             | 49.43                                                 | 28.00                             | 30.77            | -                                                     | -                                    | -                                        |
| <i>kpsMT</i> III            | 2.30                                                  | 0.00                              | 2.56             | -                                                     | -                                    | -                                        |
| PAI ( <i>malX</i> )         | 29.89                                                 | 12.00                             | 20.51            | -                                                     | -                                    | -                                        |
| <i>cvaC</i>                 | 6.90                                                  | 12.00                             | 2.56             | -                                                     | -                                    | -                                        |
| <i>ibeA</i>                 | 10.34                                                 | 0.00                              | 7.69             | -                                                     | -                                    | -                                        |
| <i>bmaE</i>                 | 4.60                                                  | 4.00                              | 28.21            | -                                                     | *** ( $P<0.0001$ )                   | * ( $P=0.0204$ )                         |
| <i>rfc</i>                  | 3.45                                                  | 4.00                              | 23.08            | -                                                     | ** ( $P=0.0013$ )                    | -                                        |
| <i>traT</i>                 | 13.79                                                 | 20.00                             | 5.13             | -                                                     | -                                    | -                                        |
| <i>gafD</i>                 | 2.30                                                  | 0.00                              | 0.00             | -                                                     | -                                    | -                                        |
| <i>afa/draBC</i>            | 5.75                                                  | 0.00                              | 0.00             | -                                                     | -                                    | -                                        |
| <i>iroN</i>                 | 26.44                                                 | 72.00                             | 43.59            | *** ( $P<0.0001$ )                                    | -                                    | -                                        |
| <i>pks</i>                  | 14.94                                                 | 44.00                             | 10.26            | ** ( $P=0.0043$ )                                     | -                                    | ** ( $P=0.0028$ )                        |

Results of genotyping are given in percentages. Two-way comparisons were performed for each gene between the different groups examined using Fisher's exact test. For each comparison, a  $P$  value of  $<0.05$  (\*), a  $P$  value of  $<0.005$  (\*\*), and a  $P$  value of  $<0.001$  (\*\*\*) were considered statistically significant, while a  $P$  value of  $>0.05$  (-) was not considered statistically significant.

**Table S2:** Primers used in this study for detection of the *fim* or *pap* determinant

| Primer   | Sequence (5'-> 3')                 | PCR product [bp] |
|----------|------------------------------------|------------------|
| papI-for | gtg aag cat gcc cac aaa ctg        | 232              |
| papI-rev | ctg gaa ttt ctg aac agg cat aat g  |                  |
| papB-for | ggc gca tca tga agt cat cag        | 309              |
| papB-rev | gtc aaa tgc cga cga ctc atc        |                  |
| papA-for | agc ttc ctt gag gca gga g          | 362              |
| papA-rev | agt cag gtt gaa att cgc aac tg     |                  |
| papH-for | gca tgt ccc ttc ctg aat act        | 331              |
| papH-rev | ctg cag att aat gcc ttt tgc ct     |                  |
| papC-for | tta taa cgg gac tgt ggg gg         | 401              |
| papC-rev | cga act gaa ctg tcc agg tc         |                  |
| papD-for | atg gct gcc atc ccc ctg            | 414              |
| papD-rev | ttg gtc tgg ttt taa ttg ctg cc     |                  |
| papJ-for | tat ggt tgt gaa taa aac aac agc ag | 403              |
| papJ-rev | gat ggt cac agc cgg ata g          |                  |
| papK-for | gat gat aaa aag cac agg cgc t      | 408              |
| papK-rev | ctt ttc ccc ctg gcc ttt g          |                  |
| papE-for | gtg aag cat gcc cac aaa ctg        | 232              |
| papE-rev | ctg gaa ttt ctg aac agg cat aat g  |                  |
| papF-for | cag att aac atc agg ggg aat g      | 396              |
| papF-rev | cgc cat tca gta tcc cgc t          |                  |
| papG-for | ccc caa ggg aca tta taa ttt tcc t  | 402              |
| papG-rev | cca gcg taa tat ttc ctc act c      |                  |
| papX-for | tga tgc aac tct gta tcc gtg t      | 329              |
| papX-rev | gtt ctt tca gat atg tgt tct gcg    |                  |
| fimB-for | aat acc ggg cct cat gct g          | 339              |
| fimB-rev | gaa tct cca gtg aca acc cg         |                  |
| fimE-for | atg cag gcg gtg tgt tac g          | 390              |
| fimE-rev | gtt cat aac cac aag cat gcc t      |                  |
| fimA-for | ggc tct ggc tga tac tac ac         | 437              |
| fimA-rev | ccg gtt gca aaa taa cgc gc         |                  |
| fimI-for | caa tgt ttg ctc tgg ccg g          | 386              |
| fimI-rev | gcc gtt tcc agt ttg ctg g          |                  |
| fimC-for | aat ggt ggt tgc cgg acg            | 445              |
| fimC-rev | gag aat tcg cgc tac gac g          |                  |
| fimD-for | gaa tct gct ggc gga tga tg         | 442              |
| fimD-rev | cat cga aaa tat cgc cct gag        |                  |
| fimF-for | gca cga tta cta tcc gcg g          | 397              |
| fimF-rev | ctg tgt cgc cat tag ccg            |                  |
| fimG-for | atg aaa tgg tgc aaa cgt ggg        | 434              |
| fimG-rev | caa tgc tct gac ctg taa cgg        |                  |
| fimH-for | ggg ctg gtc ggt aaa tgc            | 445              |
| fimH-rev | cat cgc tgt tat agt tgt tgg tc     |                  |
